# Supplementary material for: Metabolic and Transcriptomic Analyses Reveal the Effects of Ethephon on Taraxacum kok-saghyz Rodin
Source: MDPI journal article supplement (doi:10.3390/molecules27113548), 2022-05-31

**A****(S)-2,3,4,5-tetrahydropyridine-2-carboxylate**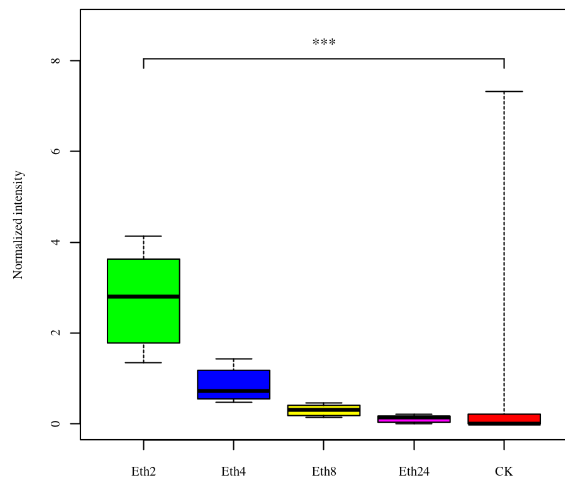**B****3-Indoleacetonitrile**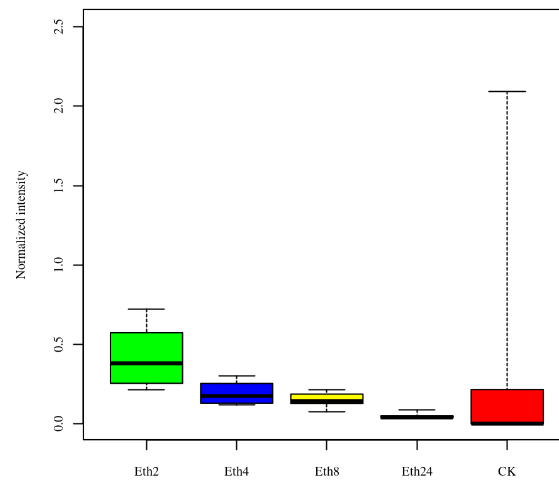**C****Betaine aldehyde**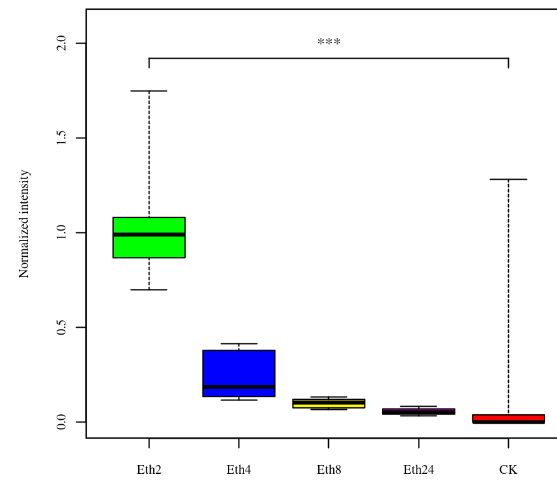**D****Alpha-Linolenic acid**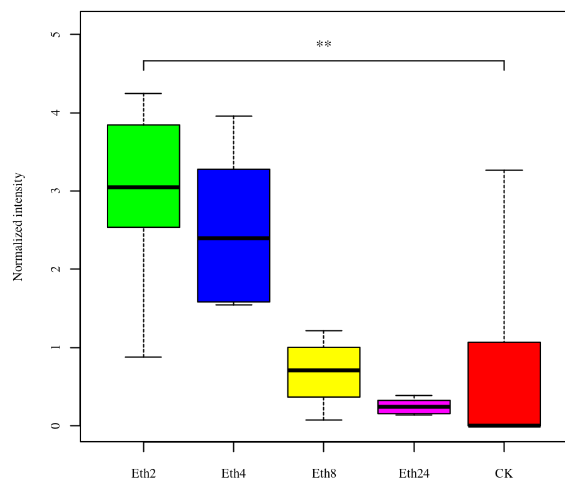**E****Anabasin**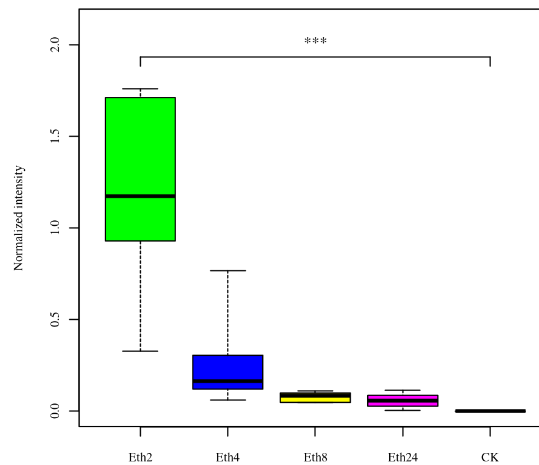**F****Pipecolic acid**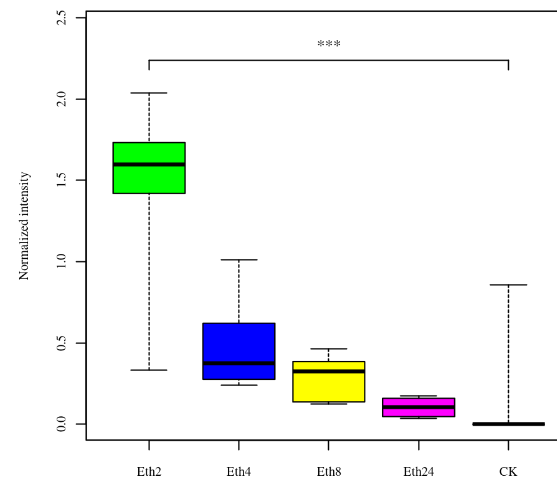

Supplement: s1 [file s1]
