# Supplementary figures and images for: Metabolic and Transcriptomic Analyses Reveal the Effects of Ethephon on Taraxacum kok-saghyz Rodin
Source: MDPI journal article supplement (doi:10.3390/molecules27113548), 2022-05-31

**A****3-(2-Hydroxyphenyl)propanoic acid**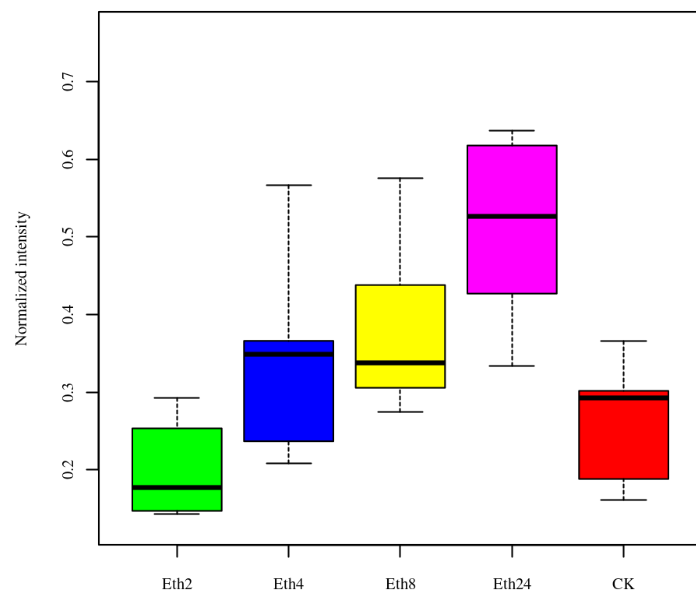**B****Bovinic acid**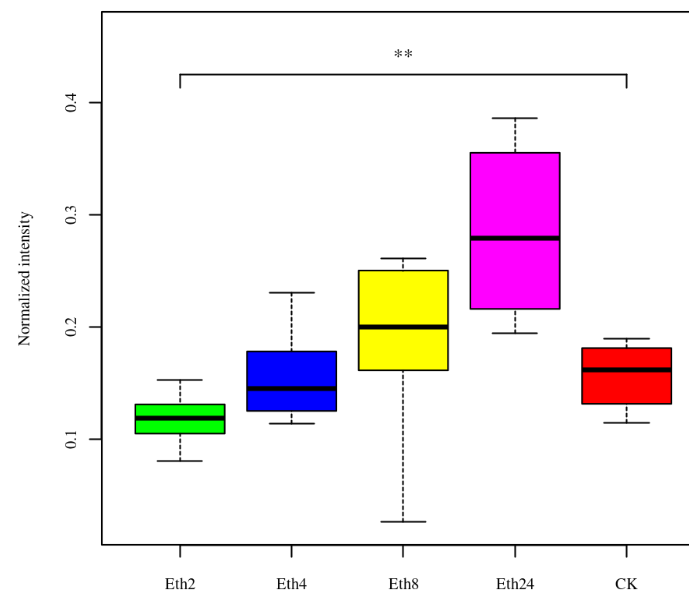**C****D-Galacturonate**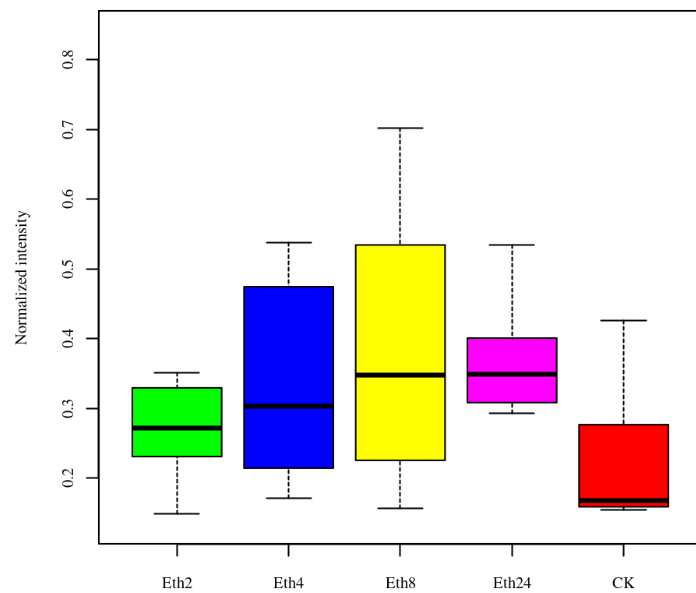**D****Gingerol**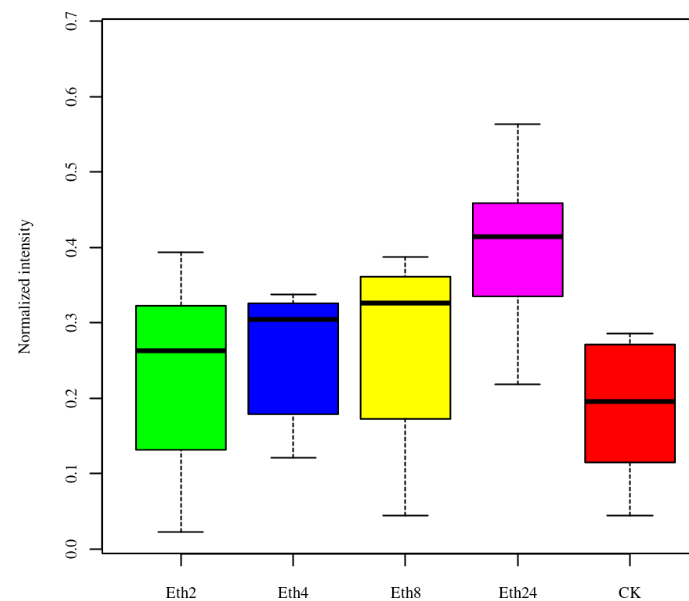

Supplement: s1 [file s1]
